# Supplementary material for: A Prediction Model of PTSD in the Israeli Population in the Aftermath of October 7th, 2023, Terrorist Attack and the Israel-Hamas War
Source: bioRxiv or medRxiv preprint supplement (doi:10.1101/2024.02.25.24303235), 2024-05-28
Supplement: Supplementary file [file media-2.pdf]

**Appendix 1-** Numerical estimations for exposure groups:

| Group                                                       | Total  | Group population estimation                                                                                                                                                                                                                                                                                                                                                                                                                                                                                                                                                                                                                                                                                                                                                                                                                                                                                                                                                   |
|-------------------------------------------------------------|--------|-------------------------------------------------------------------------------------------------------------------------------------------------------------------------------------------------------------------------------------------------------------------------------------------------------------------------------------------------------------------------------------------------------------------------------------------------------------------------------------------------------------------------------------------------------------------------------------------------------------------------------------------------------------------------------------------------------------------------------------------------------------------------------------------------------------------------------------------------------------------------------------------------------------------------------------------------------------------------------|
| <b>1. Direct exposure to the October 7th terror attacks</b> | 39,664 | <p>Participants of music festivals and citizens of communities who were subject to the terror attack of Hamas perpetrators.</p> <p>Communities included:<sup>1 2</sup><br/>                     Participants of music festivals – 3600<sup>3 4</sup><br/>                     Communities and cities in the Gaza envelope area which were invaded:</p> <ol style="list-style-type: none"> <li>1. Mishor Hagefen neighborhood, Ofaqim – 3509 (1100 households<sup>5</sup> * 3.19 people per household in Israel<sup>6</sup>)</li> <li>2. Sderot – 17647 (Sderot city was attacked in several central places<sup>7 8 9</sup>. In the absence of accurate information about the number of neighborhoods within the city that were attacked, half of the city was included).</li> <li>3. Be’eri - 1071</li> <li>4. Ein Habsor - 1109</li> <li>5. Nirim - 416</li> <li>6. Mivtahim – 455</li> <li>7. Mefalsim - 1,057</li> <li>8. Pri Gan - 249</li> <li>9. Magen – 540</li> </ol> |

<sup>1</sup> Data N12 (2023). All the settlements, all the stories: this is what the days of fighting in the Gaza Envelope looked like. *Mako*. [https://www.mako.co.il/news-specials/data\\_n12/Article-3458498d1cd3b81027.htm](https://www.mako.co.il/news-specials/data_n12/Article-3458498d1cd3b81027.htm)

<sup>2</sup> Israel Central Bureau of Statistics (2022). *Regional statistics*. <https://www.cbs.gov.il/he/publications/doclib/2019/ishuvim/bycode2022.xlsx>

<sup>3</sup> Almog, T (2024, January 1<sup>st</sup>). Victims of the Nova party demand hundreds of millions from the state. *Kan*. <https://www.kan.org.il/content/kan-news/local/667175/>

<sup>4</sup> Tzalah, Z. (2023, October 10<sup>th</sup>). 100 People participated in 'Psyduck', a small party between Nirim and Nir Oz. 10 of them are missing. *Mako*. <https://www.mako.co.il/music-news/Article-551663c5e1a1b81026.htm>

<sup>5</sup> The Day After Coalition (2022, May). *Mapping the challenge – Ofaqim - Kibbutz Galuyot and Mishor HaGefen neighborhoods*. <https://negevgalil.org.il/wp-content/uploads/2022/05/2-%D7%9E%D7%99%D7%A4%D7%95%D7%99-%D7%94%D7%90%D7%AA%D7%92%D7%A8-%D7%A9%D7%9B%D7%95%D7%A0%D7%AA-%D7%A7%D7%99%D7%91%D7%95%D7%A5-%D7%92%D7%9C%D7%95%D7%99%D7%95%D7%AA-%D7%90%D7%95%D7%A4%D7%A7%D7%99%D7%9D.pdf>

<sup>6</sup> *Households* (n.d.). Israel Central Bureau of Statistics. Retrieved February 8<sup>th</sup>, 2024, from <https://www.cbs.gov.il/en/subjects/Pages/Households.aspx>

<sup>7</sup> Heller, S. (2023, October 18<sup>th</sup>). “The helplessness cannot be forgotten”: The moments of fear from the roof in Sderot. *Walla*. <https://news.walla.co.il/item/3617078>

<sup>8</sup> Green-Shaulov, R. (2023, November 9<sup>th</sup>). The last photo of holocaust survivors - Moments before the massacre in Sderot: 'They killed them all'. *Ynet*. <https://www.ynet.co.il/news/article/ryi5jt9mp>

<sup>9</sup> Glikman, E. (2023, October 8<sup>th</sup>). The police station was destroyed, concerns about terrorists still remain: Sderot turns into a battlefield. *Ynet*. <https://www.ynet.co.il/news/article/s1clfyIb6>

|                                                                    |                              |                                                                                                                                                                                                                                                                                                                                                                                                                                                                                                                                                                                                                                    |
|--------------------------------------------------------------------|------------------------------|------------------------------------------------------------------------------------------------------------------------------------------------------------------------------------------------------------------------------------------------------------------------------------------------------------------------------------------------------------------------------------------------------------------------------------------------------------------------------------------------------------------------------------------------------------------------------------------------------------------------------------|
|                                                                    |                              | <p>10. Yad Mordechai - 830<br/> 11. Nir Yitzhak - 633<br/> 12. Erez - 616<br/> 13. Re'im – 422<br/> 14. Kissufim - 294<br/> 15. Sa'ad – 838<br/> 16. Alumim - 531<br/> 17. Nir Am – 726<br/> 18. Kerem Shalom - 220<br/> 19. Zikim - 918<br/> 20. Yakhini - 730<br/> 21. Ein HaShlosha – 353<br/> 22. Sufa - 233<br/> 23. Nir Oz – 380<br/> 24. Holit - 210<br/> 25. Netiv HaAsara - 948<br/> 26. Kfar Aza -787<br/> 27. Nahal Oz – 479<br/> 28. Gevim - 619</p> <p>The music festivals' participants (364)<sup>10</sup> and 392 civilians<sup>11</sup> (including civilian emergency squad) who were killed, were subtracted.</p> |
| <b>2. Extreme proximity to the October 7th terror attacks</b>      | 121,061<br>After subtraction | Communities and neighborhoods in this group were not infiltrated by Hamas perpetrators, but their residents were under severe perceived life threat due to the notion of the invasion to nearby areas, and the high probability of the perpetrators invading their homes. These communities include Gaza envelope settlements <sup>12</sup> , The city of Netivot (50,766) Ofaqim city (36,723) <sup>13</sup> (sum of 157,489). Civilians from 1 group were subtracted.                                                                                                                                                            |
| <b>3. Soldiers in combat and support units involved in the war</b> | 144,227<br>after subtraction | Soldiers of 10 divisions in the escalation areas - Gaza Strip, the Israel-Lebanon border, and the West Bank (sum of                                                                                                                                                                                                                                                                                                                                                                                                                                                                                                                |

<sup>10</sup> Tegania, B. (2023, November 17<sup>th</sup>). The police investigation reveals: 364 were slaughtered at the Re'im Party. *Mako*. <https://www.mako.co.il/news-military/6361323ddea5a810/Article-ec3f8e05fcedb81027.htm>

<sup>11</sup> Hovel, R (2024, January 18<sup>th</sup>). " There are two abductions you haven't heard about": Interview with the one who follows them. *Shakoof*. <https://shakuf.co.il/46990>

<sup>12</sup> The iCenter for Israel Education (2023, October). *FAQ: Gaza and Israel*. <https://theicenter.org/wp-content/uploads/2023/10/FAQ-Gaza-and-Israel.pdf>

<sup>13</sup> Israel Central Bureau of Statistics (2024, January 31<sup>th</sup>). *Population*. <https://www.cbs.gov.il/he/publications/LochutTlushim/2020/%D7%90%D7%95%D7%9B%D7%9C%D7%95%D7%A1%D7%99%D7%99%D7%942020.xlsx>

|  |  |                                                                                                                                                                                                                                                                                                                                                                                                                                                                                                                                                                                                                                                                                                                                                                                                                                                                                                                                                                          |
|--|--|--------------------------------------------------------------------------------------------------------------------------------------------------------------------------------------------------------------------------------------------------------------------------------------------------------------------------------------------------------------------------------------------------------------------------------------------------------------------------------------------------------------------------------------------------------------------------------------------------------------------------------------------------------------------------------------------------------------------------------------------------------------------------------------------------------------------------------------------------------------------------------------------------------------------------------------------------------------------------|
|  |  | <p>165,000). Divisions numbers: 36<sup>14</sup>, 252<sup>15</sup>, 143(Gaza division)<sup>16 17</sup>, 162<sup>18</sup>, 99<sup>19</sup>, 98<sup>20</sup>, 210<sup>21</sup>, 91<sup>22</sup>, 877(Judea and Samaria division)<sup>23</sup>, 146<sup>24</sup>.</p> <p>The size of a division ranges from 13,000 to 20,000 soldiers, calculated with an average of 16,500<sup>25</sup>.</p> <p>We assumed that the geographical dispersion of soldiers is similar to the general population. As mentioned, in case of multifaceted exposure, we chose the higher prevalence rate. As some soldiers reside in regions exhibiting elevated PTSD risk compared to their military service risk, (i.e., groups 1, 2,4), their relative parts of the Israeli population (group 1 – 0.41%, 2 – 1.24%, 4 – 10.94%) have been subtracted from the soldiers' group and classified in the citizens' groups (670, 2,045 and 18,058 soldiers respectively, sum of 20,773 soldiers).</p> |
|--|--|--------------------------------------------------------------------------------------------------------------------------------------------------------------------------------------------------------------------------------------------------------------------------------------------------------------------------------------------------------------------------------------------------------------------------------------------------------------------------------------------------------------------------------------------------------------------------------------------------------------------------------------------------------------------------------------------------------------------------------------------------------------------------------------------------------------------------------------------------------------------------------------------------------------------------------------------------------------------------|

<sup>14</sup> Israel Defense Forces. (2023, November 5<sup>th</sup>). *36th Division operates in Northern Gaza, reaches position along Gaza's Coast*. <https://www.idf.il/en/mini-sites/idf-press-releases-regarding-the-hamas-israel-war/november-23-pr/36th-division-operates-in-northern-gaza-reaches-position-along-gaza-s-coast/>

<sup>15</sup> Israel Defense Forces. (2023, November 18<sup>th</sup>). *An entire reserve division is maneuvering in the Gaza Strip*. <https://www.idf.il/148209>

<sup>16</sup> Zeitoun, Y. (2023, October 12<sup>th</sup>). *Gaza Brigade Commander in first statement: 'We stopped the attack. We did everything to fight'*. *Ynet*. <https://www.ynet.co.il/news/article/bjjhjssza>

<sup>17</sup> Israel Defense Forces. (2024, January 30<sup>th</sup>). *Chief of Staff to reservists in Gaza Brigade: 'There will be no refuge for terror in Gaza, in the West Bank, in Lebanon, neither above ground nor in tunnel exits''*. <https://www.idf.il/177294>

<sup>18</sup> Israel Defense Forces. (2023, December 19<sup>th</sup>). *Explosives, missiles, and rockets; Troops identified weapons production sites and a large stockpile of weapons*. <https://www.idf.il/165238>

<sup>19</sup> Israel Defense Forces. (2023, December 21<sup>th</sup>). *Special operation: 99th Division fighters expand IDF activity in the Central Gaza Strip*. <https://www.idf.il/164715>

<sup>20</sup> Israel Defense Forces. (2024, January 29<sup>th</sup>). *Combat in Khan Yunis: 98th Brigade operations above and below ground*. <https://www.idf.il/178119>

<sup>21</sup> Israel Defense Forces. (2024, January 3<sup>rd</sup>). *"We are very strongly prepared in the North, focusing on combatting Hamas"*. <https://www.idf.il/169079>

<sup>22</sup> Israel Defense Forces. (2023, December 10<sup>th</sup>). *The Chief of the General Staff conducts situational assessment in the 91st Division*. <https://www.idf.il/161185>

<sup>23</sup> Ben Gigi, N (2024, January 10<sup>th</sup>). *100 days of war on terror - The data behind the activity in Judea and Samaria revealed*. Israel Defense Forces. <https://www.idf.il/171211>

<sup>24</sup> Israel Defense Forces. (2023, December 20<sup>th</sup>). *"We're not going back to what was before"*. <https://www.idf.il/164429>

<sup>25</sup> Division. (2024, January 2). In

*HaMichlol*. <https://www.hamichlol.org.il/%D7%90%D7%95%D7%92%D7%93%D7%94>

|                                                                                                              |                                    |                                                                                                                                                                                                                                                                                                                                                                                                                                                                                                                                                                                                                                                                                                                                                                                                                                                                                                                                                                                                                                                                                                                                                                                                                                                                                                       |
|--------------------------------------------------------------------------------------------------------------|------------------------------------|-------------------------------------------------------------------------------------------------------------------------------------------------------------------------------------------------------------------------------------------------------------------------------------------------------------------------------------------------------------------------------------------------------------------------------------------------------------------------------------------------------------------------------------------------------------------------------------------------------------------------------------------------------------------------------------------------------------------------------------------------------------------------------------------------------------------------------------------------------------------------------------------------------------------------------------------------------------------------------------------------------------------------------------------------------------------------------------------------------------------------------------------------------------------------------------------------------------------------------------------------------------------------------------------------------|
| <p><b>4. Civilians under intense exposure to rocket attacks (living up to 40 km from the Gaza Strip)</b></p> | <p>1,069,011 after subtraction</p> | <p>Civilians who live in the cities and communities located up to 40 km from the Gaza-Israel border<sup>13 26</sup>. All of the relevant communities and cities are listed, but those included in categories 1 and 2 were subtracted.</p> <p>Citizens (sum of 1229736, regional councils are written in uppercase)-</p> <ol style="list-style-type: none"> <li>1. Sederot - 35295</li> <li>2. SHA'AR HANEGEV – 9900</li> <li>3. Netivot – 50765</li> <li>4. Ashqelon – 159836</li> <li>5. SEDOT NEGEV – 11474</li> <li>6. RAMAT NEGEV – 8679</li> <li>7. HOF ASHQELON – 19828</li> <li>8. Qiryat Gat – 66853</li> <li>9. ESHKOL – 15679</li> <li>10. Ofaqim – 36723</li> <li>11. SHAFIR – 13875</li> <li>12. MERHAVIM – 15018</li> <li>13. Rahat – 81836</li> <li>14. YO'AV – 9290</li> <li>15. BE'ER TOVIYYA – 23603</li> <li>16. Ashdod – 227392</li> <li>17. LAKHISH – 14237</li> <li>18. Qiryat Mal'akhi – 26197</li> <li>19. Lehavim – 7376</li> <li>20. Bene Ayish – 6771</li> <li>21. GEDEROT – 5193</li> <li>22. Gedera – 32189</li> <li>23. Be'er Sheva – 215703</li> <li>24. Laqye – 16868</li> <li>25. NAHAL SOREQ – 10286</li> <li>26. BENE SHIM'ON – 11710</li> <li>27. HEVEL YAVNE – 7055</li> <li>28. Gan Yavne – 25147</li> <li>29. Yavne – 57261</li> <li>30. Omer – 7682</li> </ol> |
| <p><b>5. Civilians under moderate exposure to rocket attacks (living 40-80)</b></p>                          | <p>4,960,469 after exclusion</p>   | <p>Civilians who live between 40-80 kilometers from the Israel-Gaza border<sup>13 26</sup>.</p> <p>Given the geographical dispersion of soldiers residential areas throughout Israel, some of them live 40 to 80 km from the Gaza Strip, an area with lower PTSD risk compared to their</p>                                                                                                                                                                                                                                                                                                                                                                                                                                                                                                                                                                                                                                                                                                                                                                                                                                                                                                                                                                                                           |

<sup>26</sup> The Ministry of Welfare and Social Affairs (n.d.). *List of settlements and their distance from the border.*

<https://www.molsa.gov.il/Subsidizing/Documents/%D7%9E%D7%95%D7%A1%D7%93%D7%95%D7%AA%20%D7%A6%D7%99%D7%91%D7%95%D7%A8/2015/%D7%99%D7%A9%D7%95%D7%91%D7%99%D7%9D%20%D7%95%D7%9E%D7%A8%D7%97%D7%A7%D7%9D%20%D7%9E%D7%94%D7%92%D7%91%D7%95%D7%9C.xls>

|                                      |  |                                                                                                                                                                                                                                                                                                                                                                                                                                                                                                                                                                                                                                                                                                                                                                                                                                                                                                                                                                                                                                                                                                                                                                                                                                                                                                                                                                                                                                                                                                                                                                                                                                                                                                                                                                                                             |
|--------------------------------------|--|-------------------------------------------------------------------------------------------------------------------------------------------------------------------------------------------------------------------------------------------------------------------------------------------------------------------------------------------------------------------------------------------------------------------------------------------------------------------------------------------------------------------------------------------------------------------------------------------------------------------------------------------------------------------------------------------------------------------------------------------------------------------------------------------------------------------------------------------------------------------------------------------------------------------------------------------------------------------------------------------------------------------------------------------------------------------------------------------------------------------------------------------------------------------------------------------------------------------------------------------------------------------------------------------------------------------------------------------------------------------------------------------------------------------------------------------------------------------------------------------------------------------------------------------------------------------------------------------------------------------------------------------------------------------------------------------------------------------------------------------------------------------------------------------------------------|
| <p><b>km from the Gaza Strip</b></p> |  | <p>military service risk. Therefore, their relative part of the Israeli population (51.66%) was assumed to be their relative part of the soldiers' group and has been subtracted from group 5 and classified in the soldiers' group (sum of 85,234 soldiers).</p> <p>Civilians (sum of 5,045,703, regional councils are written in uppercase)-</p> <ol style="list-style-type: none"> <li>1. Tel Sheva - 23,486</li> <li>2. Metar - 11,065</li> <li>3. Qiryat Eqron - 10,975</li> <li>4. Al-Kasum - 18,995</li> <li>5. Mazkeret Batya - 15,969</li> <li>6. Hura - 25,676</li> <li>7. Rehovot - 152,576</li> <li>8. Segev-Shalom - 13,010</li> <li>9. MATTE YEHUDA - 51,131</li> <li>10. Bet Shemesh - 165,582</li> <li>11. Nes Ziyona - 50,150</li> <li>12. GEZER - 27,833</li> <li>13. Be'er Ya'aqov - 33,324</li> <li>14. Rishon LeZiyyon - 264,001</li> <li>15. Ramla - 81,498</li> <li>16. Qiryat Arba - 7,563</li> <li>17. Bat Yam - 129,442</li> <li>18. GAN RAWE - 6,659</li> <li>19. Holon - 197,672</li> <li>20. Zur Hadassa - 12,091</li> <li>21. Lod - 86,968</li> <li>22. GUSH EZYON - 27,355</li> <li>23. Betar Illit - 67,141</li> <li>24. Bet Dagan - 7,859</li> <li>25. Azor - 13,386</li> <li>26. Modi'in-Makkabbim-Re'ut - 102,282</li> <li>27. Efrat - 11,942</li> <li>28. HAR HEVRON - 11,162</li> <li>29. Qiryat Ye'arim - 6,716</li> <li>30. Kuseife - 25,112</li> <li>31. Or Yehuda - 40,038</li> <li>32. Abu Ghosh - 8,029</li> <li>33. Yehud-Monoson - 31,672</li> <li>34. Giv'atayim - 62,226</li> <li>35. MATTE BINYAMIN - 77,098</li> <li>36. Tel Aviv - Yafo - 479,152</li> <li>37. Ramat Gan - 175,612</li> <li>38. Shoham - 23,729</li> <li>39. Qiryat Ono - 44,242</li> <li>40. Har Adar - 4,145</li> <li>41. Savyon - 3,960</li> <li>42. Modi'in Illit - 85,643</li> </ol> |
|--------------------------------------|--|-------------------------------------------------------------------------------------------------------------------------------------------------------------------------------------------------------------------------------------------------------------------------------------------------------------------------------------------------------------------------------------------------------------------------------------------------------------------------------------------------------------------------------------------------------------------------------------------------------------------------------------------------------------------------------------------------------------------------------------------------------------------------------------------------------------------------------------------------------------------------------------------------------------------------------------------------------------------------------------------------------------------------------------------------------------------------------------------------------------------------------------------------------------------------------------------------------------------------------------------------------------------------------------------------------------------------------------------------------------------------------------------------------------------------------------------------------------------------------------------------------------------------------------------------------------------------------------------------------------------------------------------------------------------------------------------------------------------------------------------------------------------------------------------------------------|

|                                                                                               |                                   |                                                                                                                                                                                                                                                                                                                                                                                                                                                                                                                                                                                                                                                                                                                                                                                                                                                                                                  |
|-----------------------------------------------------------------------------------------------|-----------------------------------|--------------------------------------------------------------------------------------------------------------------------------------------------------------------------------------------------------------------------------------------------------------------------------------------------------------------------------------------------------------------------------------------------------------------------------------------------------------------------------------------------------------------------------------------------------------------------------------------------------------------------------------------------------------------------------------------------------------------------------------------------------------------------------------------------------------------------------------------------------------------------------------------------|
|                                                                                               |                                   | <p>43. Mevasseret Ziyyon - 25,819<br/> 44. Ganne Tiqwa - 24,515<br/> 45. Yeroham - 11,394<br/> 46. Giv'at Shemu'el - 29,322<br/> 47. HEVEL MODI'IN - 23,923<br/> 48. Bene Beraq - 221,768<br/> 49. SEDOT DAN - 15,999<br/> 50. Petah Tiqwa - 257,388<br/> 51. El'ad - 50,191<br/> 52. Jerusalem - 995,073<br/> 53. Giv'at Ze'ev - 22,281<br/> 54. Dimona - 37,513<br/> 55. Arad - 29,319<br/> 56. Ramat HaSharon - 48,091<br/> 57. Rosh HaAyin - 75,187<br/> 58. Herzliyya - 108,955<br/> 59. Hod HaSharon - 66,007<br/> 60. Kefar Shemaryahu - 1,954<br/> 61. Kefar Qasem - 25,775<br/> 62. Ma'ale Adummim - 38,073<br/> 63. Ra'annana - 81,434<br/> 64. Kefar Bara - 4,048<br/> 65. HOF HASHARON - 15,394<br/> 66. Jaljulye - 10,824<br/> 67. Oranit - 9,385<br/> 68. Kefar Sava - 101,440<br/> 69. Bet El - 6,315<br/> 70. Elqana - 4,421<br/> 71. BRENNER - 8,065<br/> 72. TAMAR - 1,625</p> |
| <p><b>6. Indirectly affected communities (living more than 80 km from the Gaza Strip)</b></p> | <p>3,433,286 after exclusions</p> | <p>Civilians who live in communities and cities located more than 80 km from the Gaza-Israel border (sum of 3,492,279)<sup>13 26</sup>.<br/> Given the geographical dispersion of soldiers' residential areas throughout Israel, some of them more than 80 km from the Gaza Strip, an area with lower PTSD risk compared to their military service risk. Therefore, their relative part of the Israeli population (35.75%) was assumed to be their relative part of the soldiers' group, and has been subtracted from group 6 and classified in the soldiers' group (sum of 58,993 soldiers).<br/> This group includes the rest of the Israeli population (sum of 9,767,718 residents<sup>13</sup>), which is not included in the other groups.</p>                                                                                                                                              |
